# Supplementary material for: Safety and Feasibility of an Interdisciplinary Treatment Approach to Optimize Recovery From Critical Coronavirus Disease 2019
Source: PubMed Central journal article supplement — Crit Care Explor. 2021 Aug 19;3(8):e0516. doi: 10.1097/CCE.0000000000000516 (PMC8378791; doi:10.1097/cce.0000000000000516), 2021-08-19
Supplement: cc9-3-e0516-s001.pdf [file cc9-3-e0516-s001.pdf]

Supplemental Table 1: Safety events related to study protocol and severe COVID-19 recovery

| Event(s) <sup>i</sup> | Description                                                                                                                                                                                                                                                    | Classification             | Related to Protocol | Group      |
|-----------------------|----------------------------------------------------------------------------------------------------------------------------------------------------------------------------------------------------------------------------------------------------------------|----------------------------|---------------------|------------|
| 1                     | Patient complained of racing heart rate, dizziness, and anxiety at beginning of rehabilitation. ICU Recovery provider contacted, and EKG revealed a-fib (PMH of afib)                                                                                          | Anxiety / afib             | Yes, Minor AE       | In-person  |
| 2                     | Patient with increased dyspnea and fatigue after rehabilitation; patient self-selected to visit emergency room with 2-day observational stay                                                                                                                   | Fatigue                    | Yes, Major AE       | In-person  |
| 3                     | Patient reported a non-injurious fall at home in garden; event occurred on day not participating in rehabilitation or home-exercise program                                                                                                                    | Fall                       | No                  | In-person  |
| 4 - 6                 | Patient reported 3 non-injurious falls at home during iADLs; team provided education on fall prevention and proper use of assistive device                                                                                                                     | Fall                       | No                  | Telehealth |
| 7 - 9                 | Patient experienced bouts of hypertension at rest and during exercise; premature termination of one session; ICU Recovery provider contacted, and managing medications                                                                                         | HTN                        | Yes, Minor AE       | Telehealth |
| 10                    | Patient complained of discomfort and pain in right LE with one session modified; Clinic provider ordered doppler US revealing DVT of reduced size (previously diagnosed in ICU)                                                                                | Right LE DVT               | No                  | In-person  |
| 11                    | Patient with complaints of right low-back pain and minor dyspnea at beginning of session; CT image revealed pneumothorax and patient admitted to hospital                                                                                                      | Pneumothorax               | No                  | In-person  |
| 12                    | Patient with audible stridor; ICU Recovery provider aware and ordered follow-up with ENT team; patient underwent tracheal dilation                                                                                                                             | Stridor                    | No                  | In-person  |
| 13                    | Patient reported “rolling” her ankle in kitchen on a day not participating in rehabilitation or home-exercise program                                                                                                                                          | Low-grade ankle sprain     | No                  | Telehealth |
| 14 - 15               | Patient reported dizziness with pre-syncopal event after rehabilitation session; patient had a second event at home required emergency room visit, ICU Recovery provider contacted family and noted confusion with hypertensive medication causing hypotension | Hypotension (pre-syncopal) | No                  | In-person  |
| 16                    | Patient reported a fall at home while helping loved-one with groceries; event occurred on day not participating in rehabilitation or home-exercise program                                                                                                     | Fall                       | No                  | Telehealth |
| 17                    | Patient reported increasing episodes of anxiety with feelings of chest tightness and palpitations at home which occurred in morning prior to telehealth visit; Clinic provider ordered cardiac work-up with Holter monitor and ECHO revealing no abnormalities | Anxiety                    | No                  | Telehealth |
| 18                    | Patient with complaints of fear and anxiousness regarding weaning supplemental oxygen despite not requiring oxygen during six-minute walk test                                                                                                                 | Anxiety                    | Yes, Minor AE       | In-person  |

PMH = past medical history; AE = adverse event; LE =lower extremity; DVT = deep vein thrombus; EKG = electrocardiograph; afib = atrial fibrillation; iADLS = instrumental activities of daily living; ICU =intensive care unit; US = ultrasound; CT =computed tomography; ENT = ear-nose-and-throat;

<sup>i</sup> Each row represents an individual patient
