# Supplementary material for: Safety and Feasibility of an Interdisciplinary Treatment Approach to Optimize Recovery From Critical Coronavirus Disease 2019
Source: PubMed Central journal article supplement — Crit Care Explor. 2021 Aug 19;3(8):e0516. doi: 10.1097/CCE.0000000000000516 (PMC8378791; doi:10.1097/cce.0000000000000516), 2021-08-19
Supplement: cc9-3-e0516-s002.pdf [file cc9-3-e0516-s002.pdf]

Supplemental Table 2: Patient Outcomes for patients surviving severe COVID-19

| Outcome Measures       | Baseline<br>Mean ± SD (n) |                 |                 | 3-month<br>Mean ± SD (n) |                  |                 | Paired<br>t-test     | Independent<br>t-test |
|------------------------|---------------------------|-----------------|-----------------|--------------------------|------------------|-----------------|----------------------|-----------------------|
|                        | Cohort                    | In-person       | Telehealth      | Cohort                   | In-person        | Telehealth      | Time <sup>i</sup>    | Group <sup>ii</sup>   |
| 6 MWD, meters          | 224 ± 142 (32)            | 246 ± 142 (22)  | 154 ± 121 (10)  | 326 ± 143 (29)           | 362 ± 131 (20)   | 241 ± 137 (9)   | t = 5.97, p < 0.0001 | t = 1.34, p = 0.19    |
| 2-min step test        |                           |                 | 68.3 ± 23 (10)  |                          |                  | 94.3 ± 28.6 (9) | t = 2.17, p = 0.046  |                       |
| MRC-ss                 | 52.4 ± 6.3 (31)           | 52.9 ± 5.8 (22) | 51.1 ± 7.7 (9)  | 57.8 ± 3.3 (26)          | 58 ± 2.9         | 57.2 ± 5.2 (5)  | t = 3.45, p < 0.0001 | t = 0.03, p = 0.97    |
| Handgrip strength      |                           |                 |                 |                          |                  |                 |                      |                       |
| Right                  | 25.9 ± 8.9 (30)           | 26.3 ± 9.1 (22) | 25.1 ± 9.1 (8)  | 29.8 ± 9.1 (26)          | 29.3 ± 9.1 (20)  | 32.3 ± 9.3 (5)  | t = 3.01, p = 0.004  | t = 1.56, p = 0.144   |
| Left                   | 25.5 ± 9.4 (30)           | 26 ± 10.5 (22)  | 23.3 ± 10.9 (8) | 30.1 ± 9.6 (26)          | 29.5 ± 12 (20)   | 31.1 ± 8.2 (5)  | t = 3.45, p = 0.002  | t = 1.63, p = 0.131   |
| Chair stand test, sec  | 15.7 ± 7.6 (28)           | 16.0 ± 8.4 (20) | 13 ± 3.8 (8)    | 11.2 ± 4.5 (28)          | 10.6 ± 5.0 (20)  | 11.7 ± 3.1 (8)  | t = 3.56, p = 0.001  | t = 0.57, p = 0.571   |
| 4m-gait-velo, m/sec    | 0.81 ± 0.3 (32)           | 0.87 ± 0.3 (22) | 0.62 ± 0.4 (10) | 1.0 ± 0.27 (29)          | 1.07 ± 0.29 (20) | 0.98 ± 0.28 (9) | t = 4.43, p < 0.0001 | t = 2.10, p = 0.046   |
| SPPB, 0-12             | 7.8 ± 3.6 (32)            | 8.1 ± 3.3 (22)  | 6.4 ± 4.0 (10)  | 10.1 ± 2.5 (29)          | 10.6 ± 1.9 (20)  | 8.8 ± 3.4 (9)   | t = 5.01, p < 0.0001 | t = 0.04, p = 0.971   |
| TUG, sec               | 14.2 ± 8.5 (27)           | 14.6 ± 9.1 (22) | 11.6 ± 3.7 (5)  | 11.1 ± 4.95 (26)         | 11.2 ± 4.7 (20)  | 13 ± 6.1 (5)    | t = 2.73, p = 0.012  | t = 1.06, p = 0.304   |
| QOL, VAS, 0-100        | 72 ± 16.1 (32)            | 74 ± 16.9 (22)  | 64 ± 14.1 (10)  | 83.4 ± 16.6 (29)         | 87 ± 13 (20)     | 74.5 ± 21 (9)   | t = 3.85, p = 0.0005 | t = 1.05, p = 0.306   |
| HADS-anxiety           | 6.8 ± 5.3 (30)            | 5.8 ± 4.7 (20)  | 9 ± 6.1 (10)    | 6.1 ± 5.9 (28)           | 5.2 ± 5.9 (19)   | 8 ± 6.1 (9)     | t = 1.12, p = 0.270  | t = 0.96, p = 0.349   |
| HADS-depression        | 6.3 ± 4.5 (30)            | 6.4 ± 4.7 (20)  | 6.4 ± 4.3 (10)  | 4.9 ± 3.9 (28)           | 4.5 ± 3.8 (19)   | 5.8 ± 4.5 (9)   | t = 2.22, p = 0.035  | t = 0.59, p = 0.562   |
| IES-R, 0-88            | 27.2 ± 23 (28)            | 26 ± 21.2 (19)  | 29 ± 27.6 (10)  | 20.8 ± 22 (27)           | 19.8 ± 20.4 (18) | 25.5 ± 26 (9)   | t = 2.99, p = 0.006  | t = 0.16, p = 0.874   |
| MOCA, % <sup>iii</sup> | 76 ± 24 (28)              | 76 ± 22 (20)    | 73 ± 28 (10)    | 83.6 ± 19 (27)           | 86.3 ± 9.6 (18)  | 78.2 ± 30.2 (9) | t = 2.52, p = 0.018  | t = 0.27, p = 0.793   |
| MRC-dyspnea scale      | 3.5 ± 1.0 (32)            | 3.3 ± 0.98 (22) | 3.8 ± 0.93 (10) | 2.2 ± 1.1 (29)           | 2 ± 1.1 (20)     | 2.5 ± 0.88 (9)  | t = 7.78, p < 0.0001 | t = 0.13, p = 0.896   |

6 MWD = six-minute walk distance; MRC-ss = medical research council-sum score; TUG = time-up and go-test; QOL = quality of life; VAS= visual analog scale; HADS = hospital anxiety and depression scale; IES-R = Impact of Events Scale-Revised; MOCA = Montreal Cognitive Assessment;

<sup>i</sup> Paired t-test comparing baseline to 3-months for the cohort (in-person and telehealth aggregated into one group) with exception of the 2-minute step test comparing baseline to 3-months for telehealth only.

<sup>ii</sup> Independent t-test comparing outcomes at the 3-month follow-up assessment comparing in-person vs telehealth group

<sup>iii</sup> Data are presented as a percentage of MOCA full (0-30) or MOCA-blind (0-22)
